# Supplementary material for: Characterization of transgenic mouse lines for selectively targeting satellite glial cells and macrophages in dorsal root ganglia
Source: PubMed Central journal article supplement (PMC7485865; doi:10.1371/journal.pone.0229475), 2020-09-11

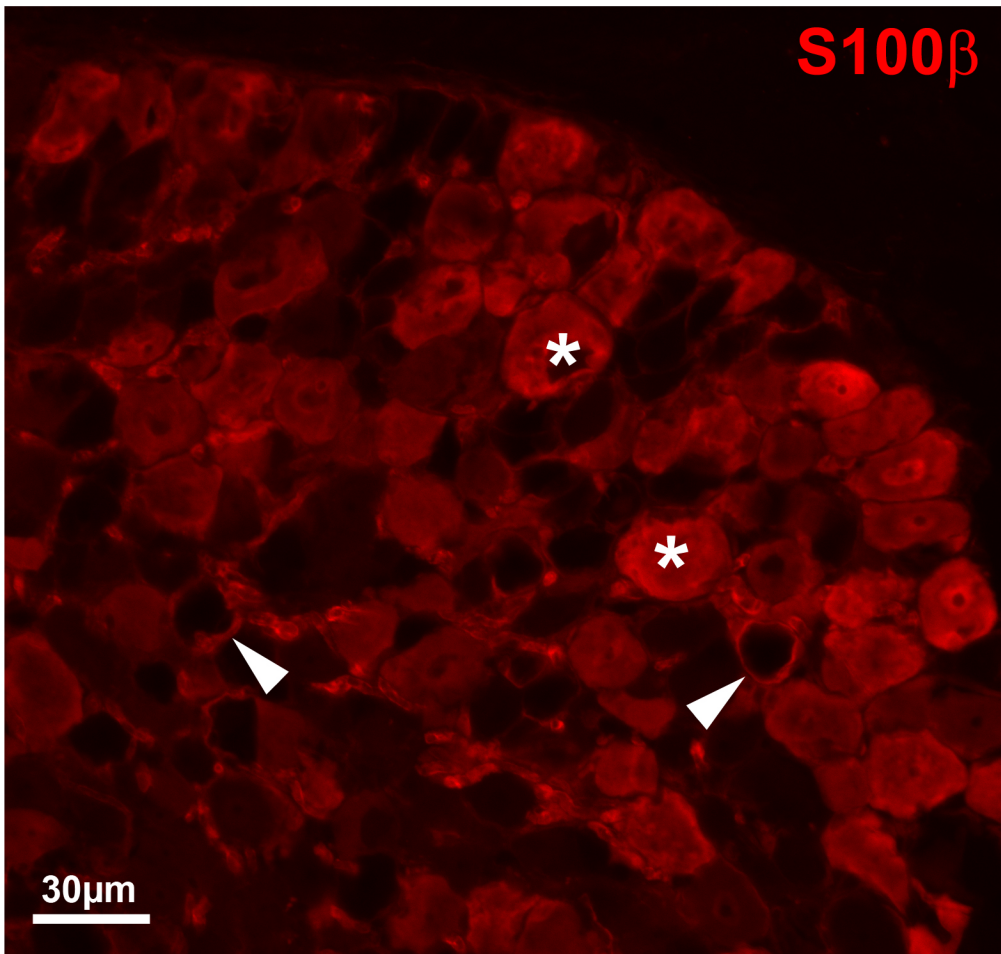

Supplement: pone.0229475.s001.pdf [file pone.0229475.s001.pdf]
